# Supplementary material
Source: Springer Nature journal article supplement (https://www.springermedizin.de/resource/supplementary/13045_2010_99_MOESM2_ESM.pdf/9660650)
Supplement: MOESM2 [file 9660650]

**CMY**  
(C/EBP $\alpha$ -)

**NB-4**  
(C/EBP $\alpha$ +)

**control vector**

**CEBPA vector**

**control RNAi**

**CEBPA RNAi**

relative quantification

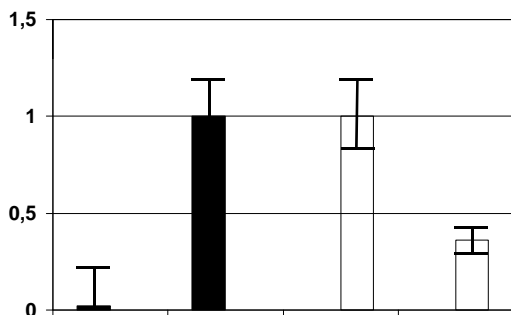

**CEBPA**

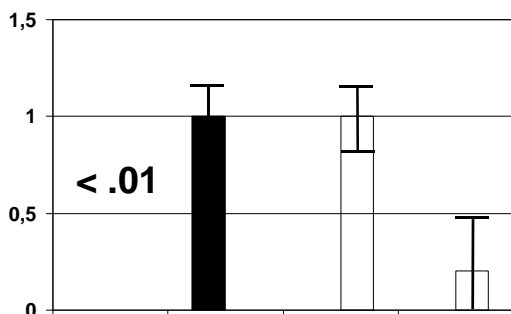

**ELA2**

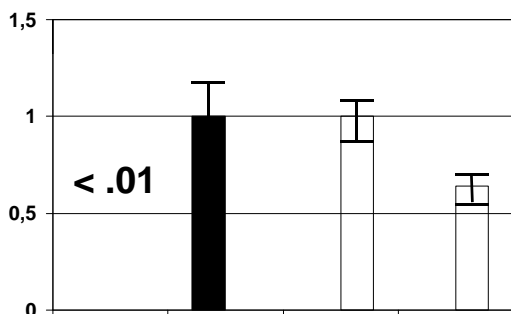

**GCSFR**

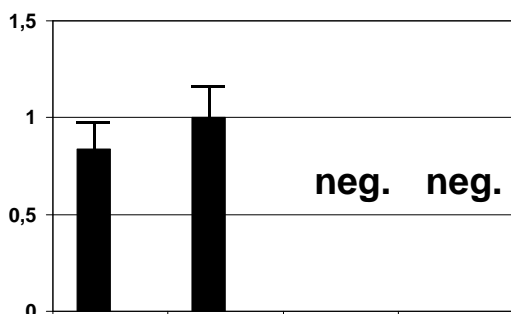

**CD7**
